# Supplementary material for: Isolated Effects of Plasma Freezing versus Thawing on Metabolite Stability
Source: MDPI journal article supplement (doi:10.3390/metabo12111098), 2022-11-11
Supplement: s1 [file s1]

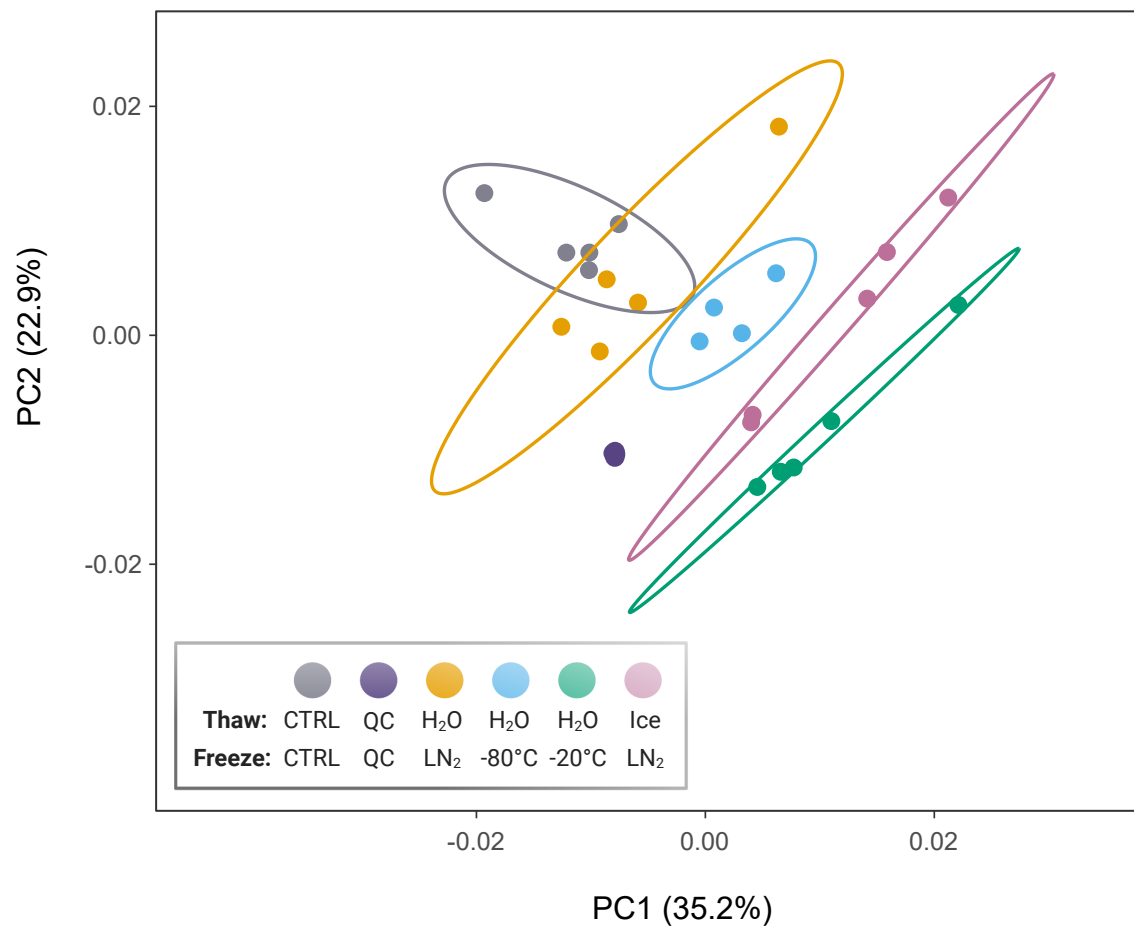

**Figure S1.** PCA of NOREVA-corrected, ratiometrically normalized peak signal intensities for each treatment group and the quality control (QC) samples.
